# Supplementary material for: Theoretical investigation of boron-doped lithium clusters, BLin (n = 3–6), activating CO2: an example of the carboxylation of C–H bonds
Source: Royal Society of Chemistry journal article supplement (doi:10.1039/c6ra15152c), 2016-01-01
Supplement: c6ra15152c1.pdf [file c6ra15152c1.pdf]

# Theoretical investigation of boron-doped lithium clusters $B\text{Li}_n$ ( $n=3-6$ ) activating $\text{CO}_2$ : An example of the carboxylation of C-H bond

Jing-Feng Ma,<sup>a</sup> Fang Ma,<sup>\*a</sup> Zhong-Jun Zhou<sup>b</sup> and Ying Tao Liu<sup>c</sup>

<sup>a</sup> School of Chemistry and Materials Science, Huaibei Normal University, Huaibei 235000, P. R. China.

E-mail: mafangchem@foxmail.com

<sup>b</sup> Institute of Theoretical Chemistry, Jilin University, Changchun, 130023, P. R. China.

<sup>c</sup> Department of Chemistry and Chemical Engineering, Ningxia University, Yinchuan 750012, P. R. China.

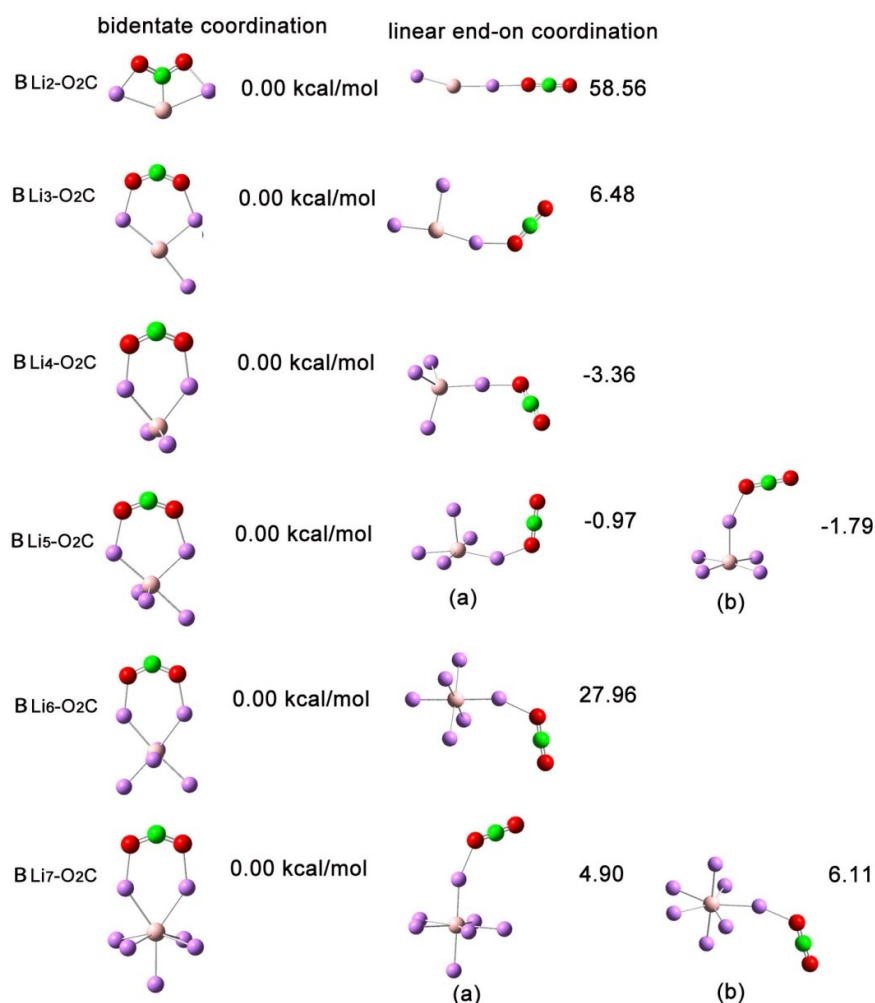

Fig S1. Comparisons of the structures and their energies between two coordination modes.

## Molecular coordinates

### 1. C-C bond formation TS1

**n=3**

|   |           |           |           |
|---|-----------|-----------|-----------|
| 3 | -2.549284 | 1.885583  | 0.609602  |
| 3 | -3.474013 | -1.092884 | -0.235537 |
| 3 | -6.359350 | -0.387505 | 0.752146  |
| 5 | -4.486368 | 0.794503  | 0.704871  |
| 6 | -0.869006 | -0.073605 | -0.480007 |
| 8 | -1.641074 | -1.023511 | -0.615802 |
| 8 | -1.028425 | 1.074221  | -0.085132 |
| 6 | 1.467480  | -1.378118 | 0.252552  |
| 6 | 1.114455  | -0.626039 | -0.914717 |
| 6 | 1.837876  | 0.583382  | -1.153823 |
| 6 | 2.659746  | 1.114452  | -0.178524 |
| 6 | 2.877540  | 0.429559  | 1.026359  |
| 6 | 2.293260  | -0.832018 | 1.216870  |
| 1 | 1.029891  | -2.359193 | 0.399001  |
| 1 | 0.732735  | -1.173482 | -1.769866 |
| 1 | 1.689241  | 1.114211  | -2.087537 |
| 1 | 3.160513  | 2.060934  | -0.354721 |
| 1 | 3.525314  | 0.851823  | 1.785646  |
| 1 | 2.509959  | -1.393737 | 2.119689  |

**n=4**

|   |           |           |           |
|---|-----------|-----------|-----------|
| 3 | 2.674393  | -1.349410 | 0.219925  |
| 3 | 3.042792  | 1.259434  | -0.249521 |
| 3 | 5.704217  | -0.094444 | 2.237502  |
| 3 | 6.472813  | -0.673473 | -0.416623 |
| 5 | 4.573272  | -0.206988 | 0.438669  |
| 6 | 0.594409  | 0.182074  | -0.602233 |
| 8 | 1.240643  | 1.242407  | -0.678046 |
| 8 | 0.940630  | -0.967780 | -0.295626 |
| 6 | -2.593612 | 0.835458  | 1.183659  |
| 6 | -1.878007 | 1.336199  | 0.110467  |
| 6 | -1.505187 | 0.482615  | -0.972718 |
| 6 | -2.076083 | -0.822944 | -1.010060 |
| 6 | -2.791059 | -1.307350 | 0.071037  |
| 6 | -3.039484 | -0.494682 | 1.186082  |
| 1 | -2.831762 | 1.483835  | 2.020772  |
| 1 | -1.547940 | 2.368636  | 0.105837  |
| 1 | -1.201431 | 0.946828  | -1.904754 |
| 1 | -1.901400 | -1.455373 | -1.873121 |
| 1 | -3.178981 | -2.320612 | 0.048187  |
| 1 | -3.603526 | -0.879938 | 2.027852  |

**n=5**

|   |           |           |           |
|---|-----------|-----------|-----------|
| 3 | 3.025552  | -1.324491 | -0.434838 |
| 3 | 2.426785  | 1.536044  | -0.190999 |
| 3 | 5.542172  | -0.970247 | 1.258650  |
| 3 | 4.923798  | 1.939677  | 1.517120  |
| 3 | 5.144572  | 0.704107  | -1.409516 |
| 5 | 4.171414  | 0.350987  | 0.359866  |
| 6 | 0.463774  | -0.379158 | -0.384338 |
| 8 | 0.679464  | 0.801722  | -0.175559 |
| 8 | 1.125193  | -1.409163 | -0.350532 |
| 6 | -2.682014 | -0.340156 | 1.389927  |
| 6 | -3.153430 | 0.869176  | 0.859999  |
| 6 | -2.908099 | 1.178438  | -0.486879 |
| 6 | -2.168616 | 0.324586  | -1.281087 |
| 6 | -1.560712 | -0.840649 | -0.721779 |
| 6 | -1.938775 | -1.206318 | 0.609081  |
| 1 | -2.917297 | -0.606846 | 2.414787  |
| 1 | -3.734601 | 1.544770  | 1.476685  |
| 1 | -3.320875 | 2.087570  | -0.911545 |
| 1 | -1.997510 | 0.563041  | -2.324962 |
| 1 | -1.240589 | -1.628974 | -1.394422 |
| 1 | -1.584855 | -2.145751 | 1.018057  |

**n=6**

|   |           |           |           |
|---|-----------|-----------|-----------|
| 3 | -2.327820 | 1.294042  | -0.014010 |
| 3 | -2.808572 | -1.398723 | -0.260733 |
| 3 | -3.477668 | -0.123373 | 2.466741  |
| 3 | -5.786731 | -1.091937 | 0.930280  |
| 3 | -5.269029 | 1.823797  | 1.193383  |
| 3 | -4.979148 | 0.492080  | -1.401329 |
| 5 | -4.158039 | 0.172936  | 0.502797  |
| 6 | -0.373692 | -0.382868 | -0.926409 |
| 8 | -1.045580 | -1.425922 | -0.884077 |
| 8 | -0.657481 | 0.796793  | -0.681555 |
| 6 | 3.432785  | -0.084683 | 0.616926  |
| 6 | 2.915016  | -1.385237 | 0.517302  |
| 6 | 2.085688  | -1.734880 | -0.533368 |
| 6 | 1.670735  | -0.753629 | -1.485691 |
| 6 | 2.310908  | 0.520008  | -1.441262 |
| 6 | 3.138921  | 0.852568  | -0.383753 |
| 1 | 4.086687  | 0.181364  | 1.439723  |
| 1 | 3.186207  | -2.129775 | 1.259129  |
| 1 | 1.697130  | -2.743523 | -0.612402 |
| 1 | 1.272058  | -1.102074 | -2.432781 |
| 1 | 2.100227  | 1.248346  | -2.215963 |
| 1 | 3.580433  | 1.842966  | -0.337995 |

## 2. H-direct transfer transition states

**n=3**

|   |           |           |           |
|---|-----------|-----------|-----------|
| 3 | 3.110687  | -0.001428 | 1.601610  |
| 3 | 3.260979  | 0.001044  | -1.354333 |
| 3 | 6.459800  | 0.001442  | -1.268472 |
| 6 | 0.764697  | -0.000374 | 0.312805  |
| 8 | 1.460041  | 0.000549  | -0.813986 |
| 8 | 1.236845  | -0.001352 | 1.445589  |
| 6 | -1.433732 | 1.226890  | -0.016530 |
| 6 | -0.689270 | 0.000014  | -0.090425 |
| 6 | -1.433916 | -1.226850 | -0.018277 |
| 6 | -2.810401 | -1.211323 | -0.120004 |
| 6 | -3.514405 | 0.000304  | -0.197723 |
| 6 | -2.810218 | 1.211714  | -0.118273 |
| 1 | -0.901378 | 2.168219  | 0.060841  |
| 1 | 0.219286  | 0.000964  | -1.351701 |
| 1 | -0.901700 | -2.168368 | 0.057731  |
| 1 | -3.353642 | -2.150191 | -0.122924 |
| 1 | -4.594582 | 0.000443  | -0.276428 |
| 1 | -3.353318 | 2.150666  | -0.119837 |
| 5 | 4.875864  | -0.000147 | 0.250728  |

**n=5**

|   |           |           |           |
|---|-----------|-----------|-----------|
| 3 | -2.832330 | -0.941930 | -1.014394 |
| 3 | -2.793528 | 0.681480  | 1.221220  |
| 3 | -6.000460 | -1.134116 | -0.958656 |
| 3 | -4.844300 | 1.493043  | -0.973563 |
| 3 | -5.929227 | 0.603073  | 1.526673  |
| 5 | -4.482101 | -0.202261 | 0.198424  |
| 6 | -0.366971 | -0.153710 | -0.123247 |
| 8 | -0.947027 | 0.628270  | 0.777143  |
| 8 | -0.946624 | -0.886086 | -0.916641 |
| 6 | 3.174391  | 1.186776  | -0.452960 |
| 6 | 3.939547  | 0.092187  | -0.012079 |
| 6 | 3.292424  | -1.078665 | 0.411862  |
| 6 | 1.915042  | -1.157983 | 0.440971  |
| 6 | 1.114363  | -0.004566 | 0.124361  |
| 6 | 1.797739  | 1.140389  | -0.432555 |
| 1 | 3.670926  | 2.073705  | -0.830995 |
| 1 | 5.021333  | 0.139836  | -0.034095 |
| 1 | 3.882206  | -1.940738 | 0.704549  |
| 1 | 1.423367  | -2.076796 | 0.738690  |
| 1 | 0.348588  | 0.641570  | 1.183897  |
| 1 | 1.213615  | 1.985033  | -0.780147 |

### 3. One H<sub>2</sub>O molecules assisting H transfer transition states

n=3

|   |           |           |           |
|---|-----------|-----------|-----------|
| 3 | -3.142760 | -1.585680 | 0.180400  |
| 3 | -3.178660 | 0.916864  | -0.616150 |
| 3 | -7.176266 | -0.732599 | -0.544365 |
| 6 | -0.735059 | -0.141697 | 0.028580  |
| 8 | -1.361250 | 0.999370  | -0.212546 |
| 8 | -1.363202 | -1.189892 | 0.309434  |
| 6 | 1.464986  | 0.640758  | -0.970844 |
| 6 | 0.745035  | -0.091687 | 0.063091  |
| 6 | 1.473400  | -1.163772 | 0.713652  |
| 6 | 2.823974  | -1.325460 | 0.504752  |
| 6 | 3.522541  | -0.516966 | -0.413017 |
| 6 | 2.813808  | 0.443434  | -1.159636 |
| 1 | 0.927779  | 1.373034  | -1.561706 |
| 1 | 0.677178  | 1.117245  | 0.938327  |
| 1 | 0.932915  | -1.820690 | 1.383739  |
| 1 | 3.355015  | -2.105846 | 1.040061  |
| 1 | 4.583794  | -0.660644 | -0.573317 |
| 1 | 3.331715  | 1.025329  | -1.914797 |
| 5 | -5.026966 | -0.410806 | -0.420102 |
| 8 | 0.208337  | 2.202936  | 1.206780  |
| 1 | -0.615448 | 1.930341  | 0.573736  |
| 1 | -0.088249 | 2.232538  | 2.125998  |

**n=4**

|   |           |           |           |
|---|-----------|-----------|-----------|
| 3 | 2.971207  | 0.872824  | 0.513033  |
| 3 | 2.958903  | -1.492093 | -0.511155 |
| 3 | 6.744954  | -0.125191 | -0.551113 |
| 3 | 5.807137  | -1.160238 | 1.907901  |
| 6 | 0.532282  | -0.074029 | -0.099096 |
| 8 | 1.215197  | -1.044896 | -0.521611 |
| 8 | 1.147963  | 1.068069  | 0.247902  |
| 6 | -2.986855 | 0.300878  | 1.216921  |
| 6 | -1.657549 | 0.569690  | 1.008467  |
| 6 | -0.927137 | -0.060187 | -0.100096 |
| 6 | -1.642461 | -1.124586 | -0.799433 |
| 6 | -2.974877 | -1.357955 | -0.560909 |
| 6 | -3.684556 | -0.640011 | 0.426435  |
| 1 | -3.505052 | 0.808522  | 2.024559  |
| 1 | -1.135949 | 1.282297  | 1.636273  |
| 1 | -0.876664 | 1.230636  | -0.863752 |
| 1 | -1.099975 | -1.712756 | -1.529519 |
| 1 | -3.488231 | -2.125682 | -1.131974 |
| 1 | -4.733773 | -0.839096 | 0.605964  |
| 5 | 4.766432  | -0.416160 | 0.231684  |
| 8 | -0.444300 | 2.352358  | -1.005000 |
| 1 | -0.160636 | 2.484492  | -1.917890 |
| 1 | 0.417550  | 1.979437  | -0.382147 |

**n=5**

|   |           |           |           |
|---|-----------|-----------|-----------|
| 3 | -2.824700 | -1.577921 | 0.142901  |
| 3 | -2.867897 | 1.012203  | -0.506008 |
| 3 | -5.955734 | -1.963652 | -0.523591 |
| 3 | -6.003482 | 0.983759  | -1.206461 |
| 3 | -5.164985 | 0.053779  | 1.410582  |
| 5 | -4.540860 | -0.384208 | -0.503802 |
| 6 | -0.408875 | -0.119454 | -0.002409 |
| 8 | -1.009861 | 1.024230  | -0.226609 |
| 8 | -1.027012 | -1.172550 | 0.255174  |
| 6 | 3.150080  | -1.330431 | 0.510626  |
| 6 | 3.856666  | -0.535692 | -0.410645 |
| 6 | 3.166960  | 0.433268  | -1.160195 |
| 6 | 1.817327  | 0.642356  | -0.977181 |
| 6 | 1.086865  | -0.084674 | 0.044524  |
| 6 | 1.799023  | -1.151662 | 0.710662  |
| 1 | 3.671954  | -2.110657 | 1.054473  |
| 1 | 4.916953  | -0.692605 | -0.566517 |
| 1 | 3.696486  | 1.010540  | -1.910347 |
| 1 | 1.288352  | 1.380680  | -1.567950 |
| 1 | 1.043266  | 1.080404  | 0.917606  |
| 1 | 1.246713  | -1.796931 | 1.382572  |
| 8 | 0.589981  | 2.181231  | 1.244343  |
| 1 | 0.289954  | 2.176866  | 2.163042  |
| 1 | -0.232113 | 1.962697  | 0.618305  |



**n=6**

|   |           |           |           |
|---|-----------|-----------|-----------|
| 3 | 2.705853  | 0.989784  | 0.487481  |
| 3 | 2.681420  | -1.444688 | -0.575051 |
| 3 | 4.957885  | 0.424541  | -1.586415 |
| 3 | 5.864958  | -1.876885 | -0.041098 |
| 3 | 5.879218  | 0.863155  | 1.152554  |
| 3 | 4.064238  | -1.204965 | 2.171058  |
| 5 | 4.422130  | -0.376732 | 0.275936  |
| 6 | 0.241735  | -0.049196 | -0.179384 |
| 8 | 0.910527  | -1.014398 | -0.619406 |
| 8 | 0.864811  | 1.090115  | 0.173999  |
| 6 | -3.942520 | -0.693130 | 0.473240  |
| 6 | -3.223173 | 0.213129  | 1.286562  |
| 6 | -1.911179 | 0.520912  | 1.033826  |
| 6 | -1.221761 | -0.022777 | -0.148857 |
| 6 | -1.951782 | -1.065112 | -0.871294 |
| 6 | -3.266520 | -1.338782 | -0.585941 |
| 1 | -4.978660 | -0.923014 | 0.688507  |
| 1 | -3.711700 | 0.662088  | 2.145984  |
| 1 | -1.374820 | 1.208654  | 1.676943  |
| 1 | -1.206490 | 1.289306  | -0.827564 |
| 1 | -1.434472 | -1.601710 | -1.657528 |
| 1 | -3.792307 | -2.083442 | -1.176185 |
| 8 | -0.777085 | 2.434195  | -0.920226 |
| 1 | 0.133764  | 1.986032  | -0.343189 |
| 1 | -0.541507 | 2.623353  | -1.836083 |

#### 4. Two H<sub>2</sub>O molecules assisting H transfer transition states

n=3

|   |           |           |           |
|---|-----------|-----------|-----------|
| 3 | -3.127578 | 0.107376  | -1.115703 |
| 3 | -3.099851 | -1.643924 | 0.790198  |
| 3 | -7.147873 | -1.266393 | -0.413446 |
| 5 | -4.992296 | -0.969645 | -0.325546 |
| 6 | -0.728365 | -0.366949 | -0.033460 |
| 8 | -1.351247 | -1.179749 | 0.714457  |
| 8 | -1.356861 | 0.534008  | -0.742412 |
| 6 | 3.526998  | -0.828181 | -0.467115 |
| 6 | 2.821592  | 0.062120  | -1.298045 |
| 6 | 1.466949  | 0.263266  | -1.141667 |
| 6 | 0.743131  | -0.390588 | -0.069774 |
| 6 | 1.467869  | -1.390225 | 0.687396  |
| 6 | 2.823424  | -1.561448 | 0.507670  |
| 1 | 4.591166  | -0.977142 | -0.602500 |
| 1 | 3.346992  | 0.584204  | -2.091020 |
| 1 | 0.927112  | 0.929032  | -1.802971 |
| 1 | 0.850251  | 0.766658  | 0.931125  |
| 1 | 0.919921  | -1.980984 | 1.410595  |
| 1 | 3.351476  | -2.292478 | 1.111406  |
| 8 | 0.877388  | 1.727667  | 1.574793  |
| 1 | 0.237016  | 2.363344  | 1.055055  |
| 1 | 0.509076  | 1.529277  | 2.446300  |
| 8 | -0.663712 | 2.924546  | 0.012819  |
| 1 | -0.999321 | 2.069873  | -0.407269 |
| 1 | -1.420428 | 3.485507  | 0.206574  |

**n=4**

|   |           |           |           |
|---|-----------|-----------|-----------|
| 3 | -2.864045 | 0.253863  | -0.545225 |
| 3 | -2.960307 | -1.679563 | 0.881066  |
| 3 | -6.847897 | -0.228666 | 0.558183  |
| 3 | -5.783468 | -1.748507 | -1.552050 |
| 5 | -4.819987 | -0.771303 | 0.041593  |
| 6 | -0.583692 | -0.156159 | -0.152439 |
| 8 | -1.413469 | -0.909913 | 0.487741  |
| 8 | -1.086936 | 0.862852  | -0.817486 |
| 6 | 3.581627  | -1.163521 | -0.308024 |
| 6 | 3.056831  | -0.154599 | -1.144314 |
| 6 | 1.733673  | 0.215466  | -1.081067 |
| 6 | 0.839163  | -0.385458 | -0.098924 |
| 6 | 1.378580  | -1.503408 | 0.662496  |
| 6 | 2.709833  | -1.839495 | 0.572380  |
| 1 | 4.626202  | -1.442461 | -0.370941 |
| 1 | 3.704539  | 0.326227  | -1.870833 |
| 1 | 1.339703  | 0.969424  | -1.751203 |
| 1 | 1.016890  | 0.791354  | 0.966522  |
| 1 | 0.711170  | -2.048526 | 1.318299  |
| 1 | 3.091764  | -2.656542 | 1.177041  |
| 8 | 1.125980  | 1.732985  | 1.562131  |
| 1 | 0.622008  | 2.446575  | 0.938399  |
| 1 | 0.656898  | 1.619723  | 2.399130  |
| 8 | -0.048125 | 3.063994  | -0.133484 |
| 1 | -0.509208 | 2.234999  | -0.542316 |
| 1 | -0.708578 | 3.748059  | 0.010155  |

**n=5**

|   |           |           |           |
|---|-----------|-----------|-----------|
| 3 | -2.877623 | 0.487754  | -0.923372 |
| 3 | -2.855981 | -1.587311 | 0.716189  |
| 3 | -4.933994 | -1.751034 | -1.595409 |
| 3 | -6.091722 | 0.816256  | -0.764088 |
| 5 | -4.606070 | -0.493700 | -0.011429 |
| 6 | -0.440588 | -0.327110 | -0.077261 |
| 8 | -1.076770 | -1.176971 | 0.601267  |
| 8 | -1.020949 | 0.630899  | -0.730716 |
| 6 | 3.818799  | -0.874809 | -0.465896 |
| 6 | 3.154510  | 0.083089  | -1.251920 |
| 6 | 1.803763  | 0.314101  | -1.098552 |
| 6 | 1.046581  | -0.373736 | -0.074404 |
| 6 | 1.729882  | -1.437782 | 0.628060  |
| 6 | 3.082446  | -1.640814 | 0.456613  |
| 1 | 4.879785  | -1.048803 | -0.597429 |
| 1 | 3.706268  | 0.629793  | -2.009547 |
| 1 | 1.288331  | 1.021959  | -1.735258 |
| 1 | 1.152992  | -2.049242 | 1.310346  |
| 1 | 3.580650  | -2.420162 | 1.023660  |
| 8 | 1.131403  | 1.608796  | 1.711090  |
| 1 | 0.597829  | 2.307404  | 1.173121  |
| 1 | 0.640680  | 1.394682  | 2.516222  |
| 8 | -0.297152 | 2.996967  | 0.156283  |
| 1 | -0.615660 | 2.183715  | -0.336099 |
| 1 | 0.084525  | 3.604669  | -0.484676 |
| 3 | -6.063245 | -1.548517 | 1.108468  |
| 1 | 1.118030  | 0.657878  | 0.968200  |

**n=6**

|   |           |           |           |
|---|-----------|-----------|-----------|
| 3 | 2.717010  | 0.514602  | 0.834248  |
| 3 | 2.784326  | -1.232829 | -1.098048 |
| 3 | 5.129474  | 0.843532  | -1.168132 |
| 3 | 5.970315  | -1.891317 | -0.649802 |
| 3 | 5.898917  | 0.127228  | 1.552936  |
| 5 | 4.500555  | -0.632831 | 0.178710  |
| 6 | 0.332449  | -0.134221 | -0.101192 |
| 8 | 1.052975  | -0.778662 | -0.934901 |
| 8 | 0.891466  | 0.808547  | 0.654137  |
| 6 | -3.781695 | -1.230458 | 0.465411  |
| 6 | -3.156607 | -0.319858 | 1.345550  |
| 6 | -1.853803 | 0.081454  | 1.160127  |
| 6 | -1.089162 | -0.376592 | 0.006158  |
| 6 | -1.717415 | -1.407714 | -0.809405 |
| 6 | -3.024304 | -1.779470 | -0.592912 |
| 1 | -4.808753 | -1.535063 | 0.625091  |
| 1 | -3.708225 | 0.058416  | 2.201040  |
| 1 | -1.382183 | 0.758295  | 1.861861  |
| 1 | -1.435610 | 0.907503  | -0.902392 |
| 1 | -1.132568 | -1.858748 | -1.601482 |
| 1 | -3.475312 | -2.528064 | -1.237795 |
| 8 | -1.619393 | 1.894320  | -1.375600 |
| 1 | -0.997118 | 2.538111  | -0.744424 |
| 1 | -1.279042 | 1.855100  | -2.278652 |
| 8 | -0.194336 | 3.017658  | 0.245746  |
| 1 | 0.301973  | 2.129043  | 0.523168  |
| 1 | 0.461069  | 3.689476  | 0.036235  |
| 3 | 4.050133  | -2.155771 | 1.550902  |
